# Supplementary material for: A Gedunin-Type Limonoid, 7-Deacetoxy-7-Oxogedunin, from Andiroba (Carapa guianensis Aublet) Reduced Intracellular Triglyceride Content and Enhanced Autophagy in HepG2 Cells
Source: MDPI journal article supplement (doi:10.3390/ijms232113141), 2022-10-28
Supplement: s1 [file s1]

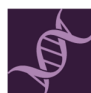

Supplementary Materials

# A Gedunin-Type Limonoid, 7-Deacetoxy-7-oxogedunin, from Andiroba (*Carapa guianensis* Aublet) Reduced Intracellular Triglyceride Content and Enhanced Autophagy in HepG2 Cells

Akifumi Nagatomo <sup>1</sup>, Kiyofumi Ninomiya <sup>1,2</sup>, Shinsuke Marumoto <sup>3</sup>, Chie Sakai <sup>1</sup>, Shuta Watanabe <sup>1</sup>, Wakana Ishikawa <sup>1</sup>, Yoshiaki Manse <sup>1</sup>, Takashi Kikuchi <sup>4,5</sup>, Takeshi Yamada <sup>4</sup>, Reiko Tanaka <sup>4</sup>, Osamu Muraoka <sup>1,6</sup> and Toshio Morikawa <sup>1,6,\*</sup>

<sup>1</sup> Pharmaceutical Research and Technology Institute, Kindai University, 3-4-1 Kowakae, Higashi-Osaka 577-8502, Osaka, Japan

<sup>2</sup> School of Pharmacy, Shujitsu University, 1-6-1 Nishigawara, Naka-ku, Okayama 703-8516, Okayama, Japan

<sup>3</sup> Joint Research Center, Kindai University, 3-4-1 Kowakae, Higashi-Osaka 577-8502, Osaka, Japan

<sup>4</sup> Faculty of Pharmacy, Osaka Medical and Pharmaceutical University, 4-20-1 Nasahara, Takatsuki 569-1094, Osaka, Japan

<sup>5</sup> Faculty of Pharmacy, Toho University, 2-2-1 Miyama, Funabashi 274-8510, Chiba, Japan

<sup>6</sup> Antiaging Center, Kindai University, 3-4-1 Kowakae, Higashi-Osaka 577-8502, Osaka, Japan

\* Correspondence: morikawa@kindai.ac.jp; Tel.: +81-6-4307-4306; Fax: +81-6-6729-3577

## Table of Contents

|                                                                                        |    |
|----------------------------------------------------------------------------------------|----|
| Figure S1. Unedited blots for Figure 4B.....                                           | S2 |
| Figure S2. Unedited blots for Figure 5A.....                                           | S3 |
| Figure S3. <sup>1</sup> H-NMR (400 MHz, CDCl <sub>3</sub> ) spectrum of DAOG (1).....  | S4 |
| Figure S4. <sup>13</sup> C-NMR (100 MHz, CDCl <sub>3</sub> ) spectrum of DAOG (1)..... | S5 |
| Table S1. Numerical data of MTT assay for Figure 3.....                                | S6 |
| Table S2. Numerical data of intracellular TG reduction assay for Figure 4A .....       | S6 |
| Table S3. Numerical data of western blot analysis for Figure 4C.....                   | S6 |
| Table S4. Numerical data of western blot analysis for Figure 5B .....                  | S7 |
| Table S5. Numerical data of western blot analysis for Figure 5C.....                   | S7 |
| Table S6. Numerical data of mRNA expressions for Figure 5D.....                        | S7 |

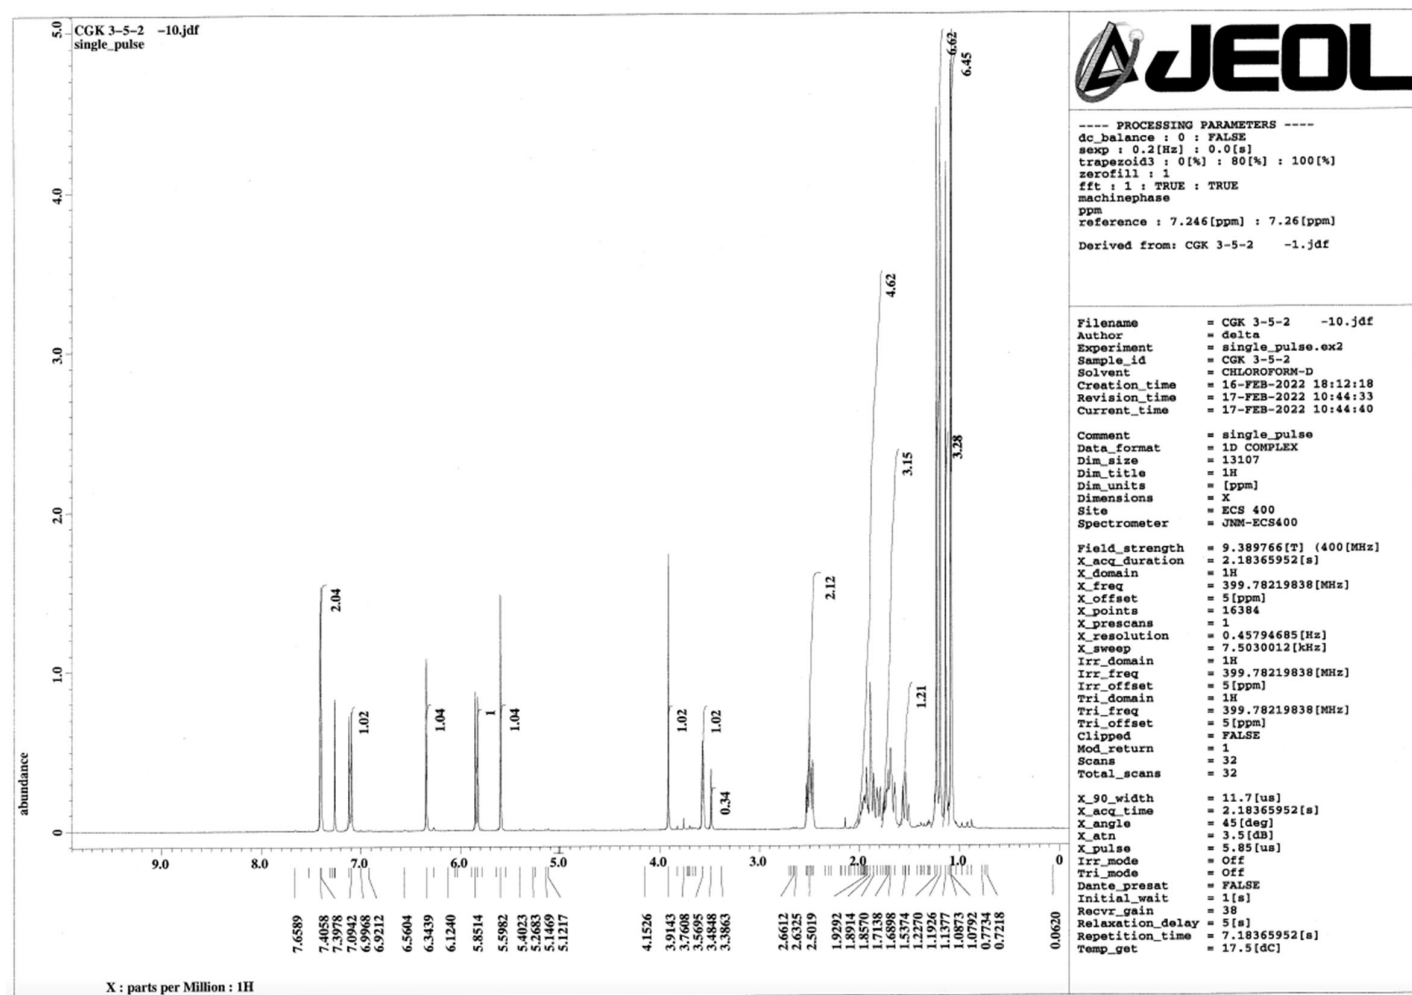Figure S1.  $^1\text{H}$ -NMR (400 MHz,  $\text{CDCl}_3$ ) spectrum of DAOG (1).

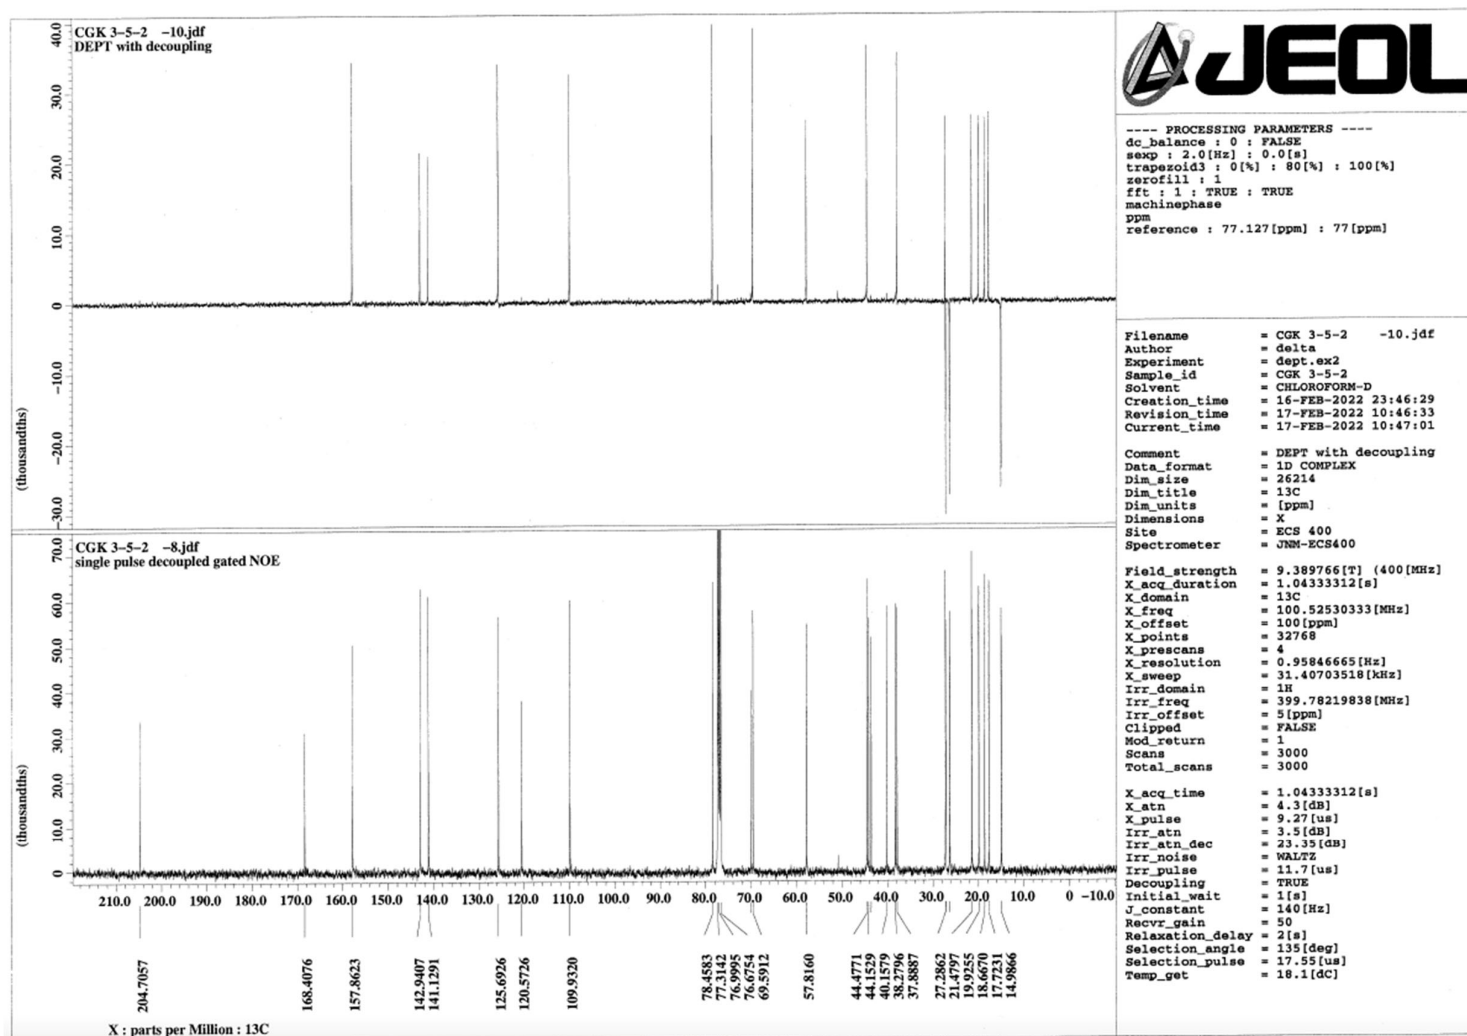

Figure S2.  $^{13}\text{C}$ -NMR (100 MHz,  $\text{CDCl}_3$ ) spectrum of DAOG (1).

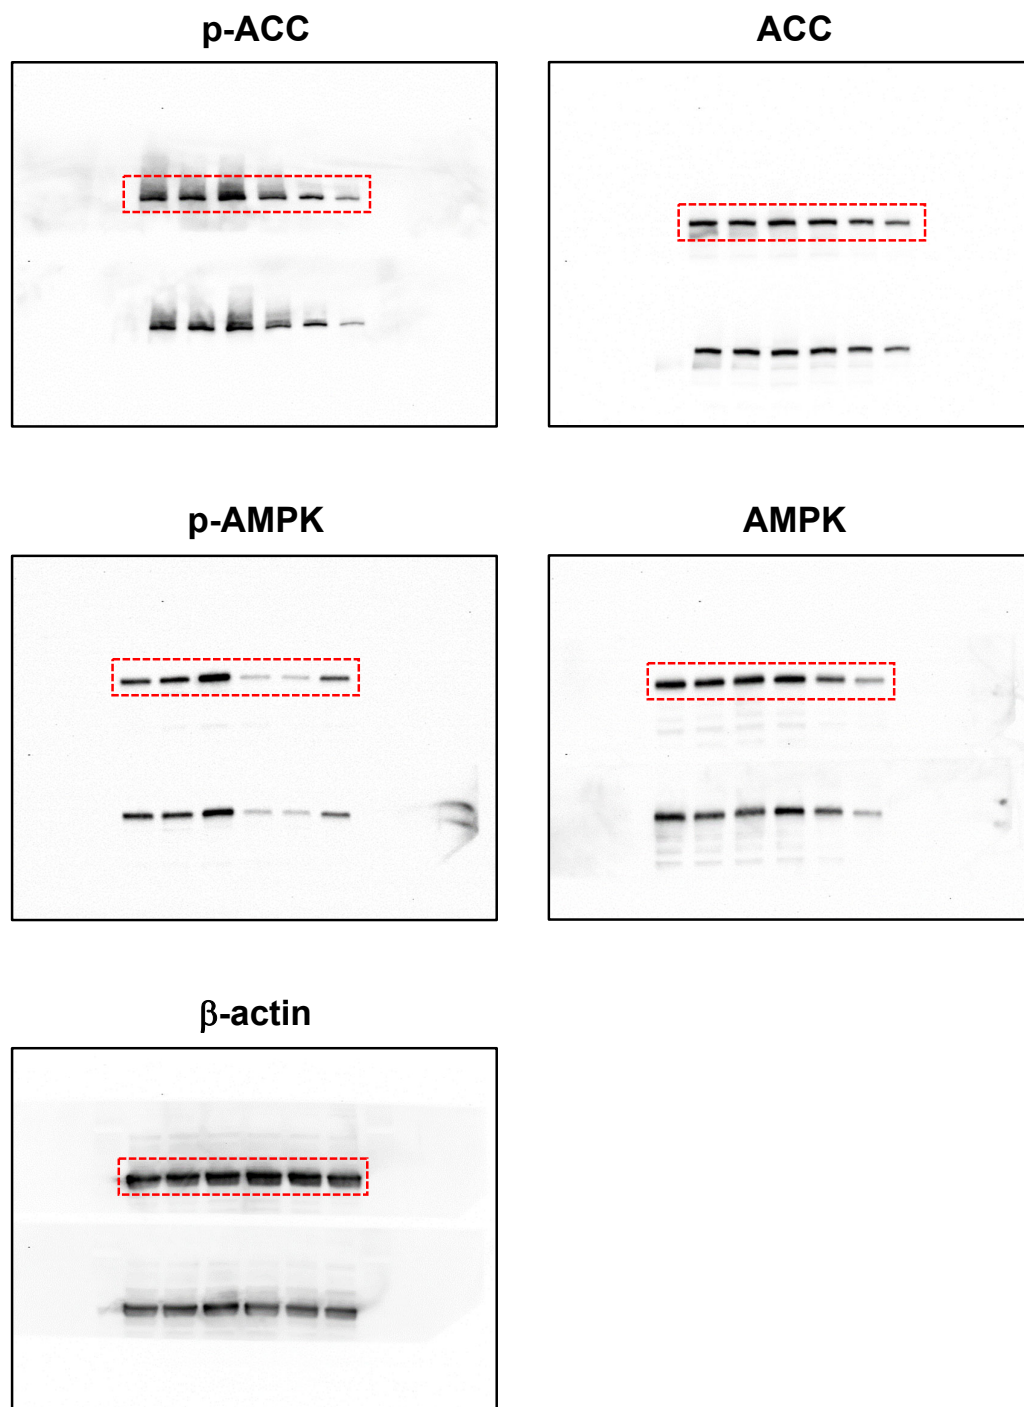

**Figure S3.** Unedited blots for Figure 4B.

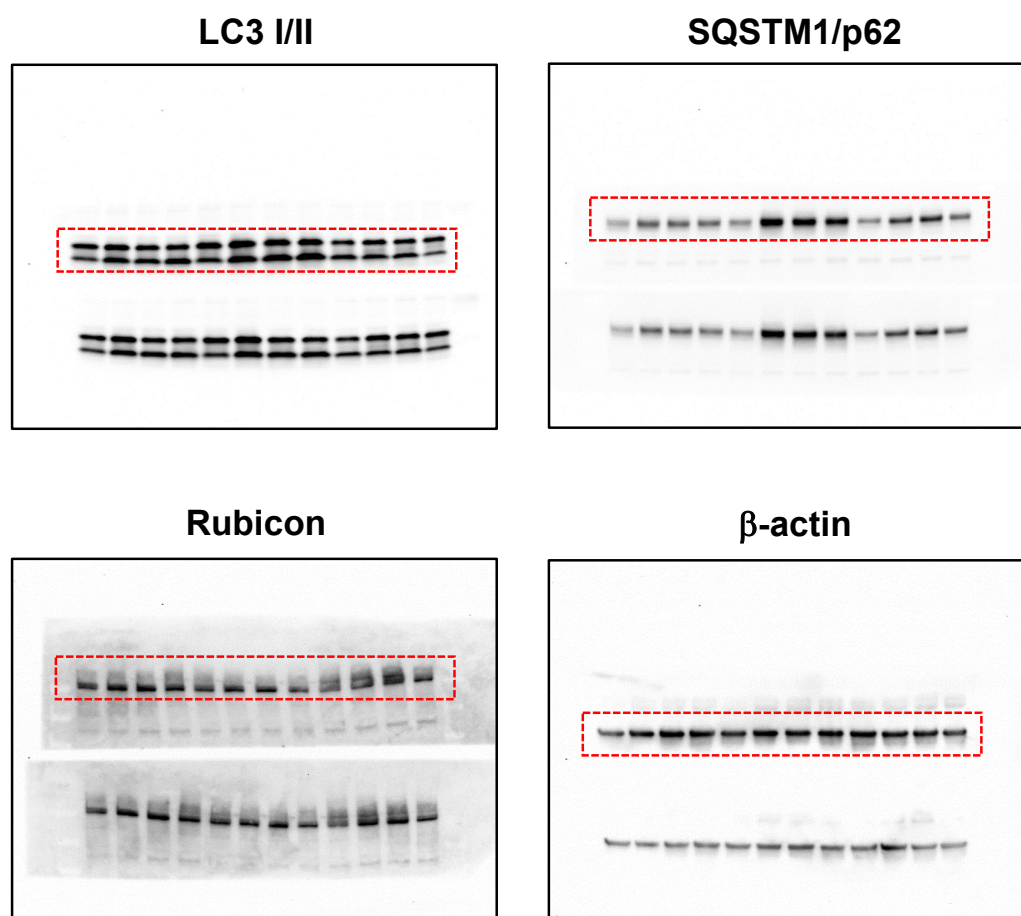

**Figure S4.** Unedited blots for Figure 5A.

**Table S1.** Numerical data of MTT assay for Figure 3.

| Treatment | Cell viability (%) |                 |                 |                  |                  |                  |
|-----------|--------------------|-----------------|-----------------|------------------|------------------|------------------|
|           | 0 $\mu$ M          | 2.5 $\mu$ M     | 5 $\mu$ M       | 10 $\mu$ M       | 20 $\mu$ M       | 40 $\mu$ M       |
| DAOG (1)  | 100.0 $\pm$ 1.4    | 97.8 $\pm$ 0.6  | 98.0 $\pm$ 0.1  | 96.2 $\pm$ 0.5** | 95.6 $\pm$ 0.2** | 94.5 $\pm$ 0.7** |
| BBR       | 0 $\mu$ M          | 1 $\mu$ M       | 3 $\mu$ M       | 10 $\mu$ M       | 30 $\mu$ M       | 100 $\mu$ M      |
|           | 100.0 $\pm$ 0.5    | 100.0 $\pm$ 0.5 | 100.0 $\pm$ 0.6 | 98.0 $\pm$ 0.2   | 96.2 $\pm$ 0.4** | 1.6 $\pm$ 0.7**  |

Each value represents the mean  $\pm$  S.E.M. ( $n = 4$ ). Significantly different from the control, \*\*  $p < 0.01$  (Dunnett). DAOG; 7-deacetoxy-7-oxogedunin, BBR; berberine chloride.

**Table S2.** Numerical data of intracellular TG reduction assay for Figure 4A.

| Treatment | Compound C<br>20 $\mu$ M | TG/protein in the homogenate (% of control) |                    |                    |                     |
|-----------|--------------------------|---------------------------------------------|--------------------|--------------------|---------------------|
|           |                          | 0 $\mu$ M                                   | 5 $\mu$ M          | 10 $\mu$ M         | 20 $\mu$ M          |
| DAOG (1)  | –                        | 100.0 $\pm$ 1.7                             | 91.2 $\pm$ 1.7*    | 80.1 $\pm$ 0.9**   | 71.3 $\pm$ 1.6**    |
|           | +                        | 100.0 $\pm$ 2.0                             | 90.5 $\pm$ 1.3**   | 86.3 $\pm$ 1.2**## | 97.9 $\pm$ 0.9##    |
|           |                          | 0 $\mu$ M                                   | 7.5 $\mu$ M        | 15 $\mu$ M         | 30 $\mu$ M          |
| BBR       | –                        | 100.0 $\pm$ 3.8                             | 89.3 $\pm$ 3.4     | 91.2 $\pm$ 2.8     | 82.6 $\pm$ 2.4**    |
|           | +                        | 100.0 $\pm$ 1.1                             | 109.6 $\pm$ 1.8*## | 107.3 $\pm$ 3.1##  | 149.0 $\pm$ 2.6**## |

Each value represents the mean  $\pm$  S.E.M. ( $n = 4$ ). \*  $p < 0.05$ , \*\*  $p < 0.01$  vs. control cells treated with vehicle (Dunnett); ##  $p < 0.01$  vs. compound C-nontreated cells (Student's  $t$ ). DAOG; 7-deacetoxy-7-oxogedunin, BBR; berberine chloride.

**Table S3.** Numerical data of western blot analysis for Figure 4C.

| Protein     | Compound C<br>20 $\mu$ M | Relative expression (fold increase) |                      |                   |
|-------------|--------------------------|-------------------------------------|----------------------|-------------------|
|             |                          | Control                             | DAOG (1, 20 $\mu$ M) | BBR (30 $\mu$ M)  |
| p-AMPK/AMPK | –                        | 1.00 $\pm$ 0.00                     | 1.43 $\pm$ 0.07      | 3.21 $\pm$ 0.66** |
|             | +                        | 0.26 $\pm$ 0.04##                   | 0.41 $\pm$ 0.06##    | 1.68 $\pm$ 0.47** |
| p-ACC/ACC   | –                        | 1.00 $\pm$ 0.00                     | 0.86 $\pm$ 0.09      | 0.96 $\pm$ 0.14   |
|             | +                        | 0.57 $\pm$ 0.09##                   | 0.57 $\pm$ 0.04#     | 0.37 $\pm$ 0.06## |

Each value represents the mean  $\pm$  S.E.M. ( $n = 4$ ). \*\*  $p < 0.01$  vs. control cells treated with vehicle (Dunnett); #  $p < 0.05$ , ##  $p < 0.01$  vs. compound C-nontreated cells (Student's  $t$ ). DAOG; 7-deacetoxy-7-oxogedunin, BBR; berberine chloride.

**Table S4.** Numerical data of western blot analysis for Figure 5B.

| Protein                     | Treatment            | Relative expression (fold increase) |                     |                     |                     |
|-----------------------------|----------------------|-------------------------------------|---------------------|---------------------|---------------------|
|                             |                      | 0 h                                 | 6 h                 | 12 h                | 24 h                |
| LC3-II / $\beta$ -actin     | Control              | 1.00 $\pm$ 0.00                     | 1.25 $\pm$ 0.10     | 0.93 $\pm$ 0.08     | 1.13 $\pm$ 0.08     |
|                             | DAOG (1, 20 $\mu$ M) | 1.00 $\pm$ 0.00                     | 1.43 $\pm$ 0.12     | 1.48 $\pm$ 0.18#    | 1.55 $\pm$ 0.17*    |
|                             | BBR (30 $\mu$ M)     | 1.00 $\pm$ 0.00                     | 0.90 $\pm$ 0.15     | 1.13 $\pm$ 0.15     | 0.66 $\pm$ 0.18     |
| SQSTM1/p62 / $\beta$ -actin | Control              | 1.00 $\pm$ 0.00                     | 1.60 $\pm$ 0.18*    | 1.24 $\pm$ 0.15     | 1.30 $\pm$ 0.12     |
|                             | DAOG (1, 20 $\mu$ M) | 1.00 $\pm$ 0.00                     | 2.74 $\pm$ 0.15**## | 2.70 $\pm$ 0.22**## | 2.18 $\pm$ 0.17**## |
|                             | BBR (30 $\mu$ M)     | 1.00 $\pm$ 0.00                     | 1.67 $\pm$ 0.19     | 2.06 $\pm$ 0.31**   | 1.28 $\pm$ 0.20     |
| Rubicon / $\beta$ -actin    | Control              | 1.00 $\pm$ 0.00                     | 1.08 $\pm$ 0.11     | 1.08 $\pm$ 0.12     | 1.12 $\pm$ 0.10     |
|                             | DAOG (1, 20 $\mu$ M) | 1.00 $\pm$ 0.00                     | 0.75 $\pm$ 0.03**   | 0.76 $\pm$ 0.03**   | 0.62 $\pm$ 0.08**#  |
|                             | BBR (30 $\mu$ M)     | 1.00 $\pm$ 0.00                     | 1.03 $\pm$ 0.22     | 1.18 $\pm$ 0.30     | 0.80 $\pm$ 0.19     |

Each value represents the mean  $\pm$  S.E.M. ( $n = 4$ ); \*  $p < 0.05$ , \*\*  $p < 0.01$  vs. initial (0 h) expression (Dunnett); #  $p < 0.05$ , ##  $p < 0.01$  vs. control group at each sampling point (Dunnett). DAOG; 7-deacetoxy-7-oxogedunin, BBR; berberine chloride.

**Table S5.** Numerical data of autophagy flux assay for Figure 5C.

| Protein                 | CQ          | Relative expression (fold increase) |                               |                              |
|-------------------------|-------------|-------------------------------------|-------------------------------|------------------------------|
|                         | 100 $\mu$ M | Control                             | DAOG (1, 20 $\mu$ M)          | BBR (30 $\mu$ M)             |
| LC3-II / $\beta$ -actin | –           | 1.01 $\pm$ 0.06 <sup>ab</sup>       | 1.34 $\pm$ 0.06 <sup>ac</sup> | 0.72 $\pm$ 0.04 <sup>b</sup> |
|                         | +           | 1.84 $\pm$ 0.05 <sup>c</sup>        | 2.58 $\pm$ 0.21 <sup>d</sup>  | 1.77 $\pm$ 0.21 <sup>c</sup> |

Each value represents the mean  $\pm$  S.E.M. ( $n = 4$ ). Different letters indicate significant differences,  $p < 0.05$  (Tukey-Kramer's HSD). CQ; chloroquine, DAOG; 7-deacetoxy-7-oxogedunin, BBR; berberine chloride.

**Table S6.** Numerical data of mRNA expressions for Figure 5D.

| Treatment            | mRNA level        |                   |
|----------------------|-------------------|-------------------|
|                      | SQSTM1 / RPLP0    | RUBCN / RPLP0     |
| Control              | 1.02 $\pm$ 0.13   | 1.01 $\pm$ 0.08   |
| DAOG (1, 20 $\mu$ M) | 2.93 $\pm$ 0.07** | 0.63 $\pm$ 0.02** |

Each value represents the mean  $\pm$  S.E.M. ( $n = 4$ ). Significantly different from the control, \*\*  $p < 0.01$  (Student's  $t$ ). DAOG; 7-deacetoxy-7-oxogedunin, BBR; berberine chloride.
